# Supplementary material
Source: publisher figshare collection journal article supplement (https://gsajournals.figshare.com/articles/dataset/_/13370819)
Supplement: Supplementary file 1 [file 1]

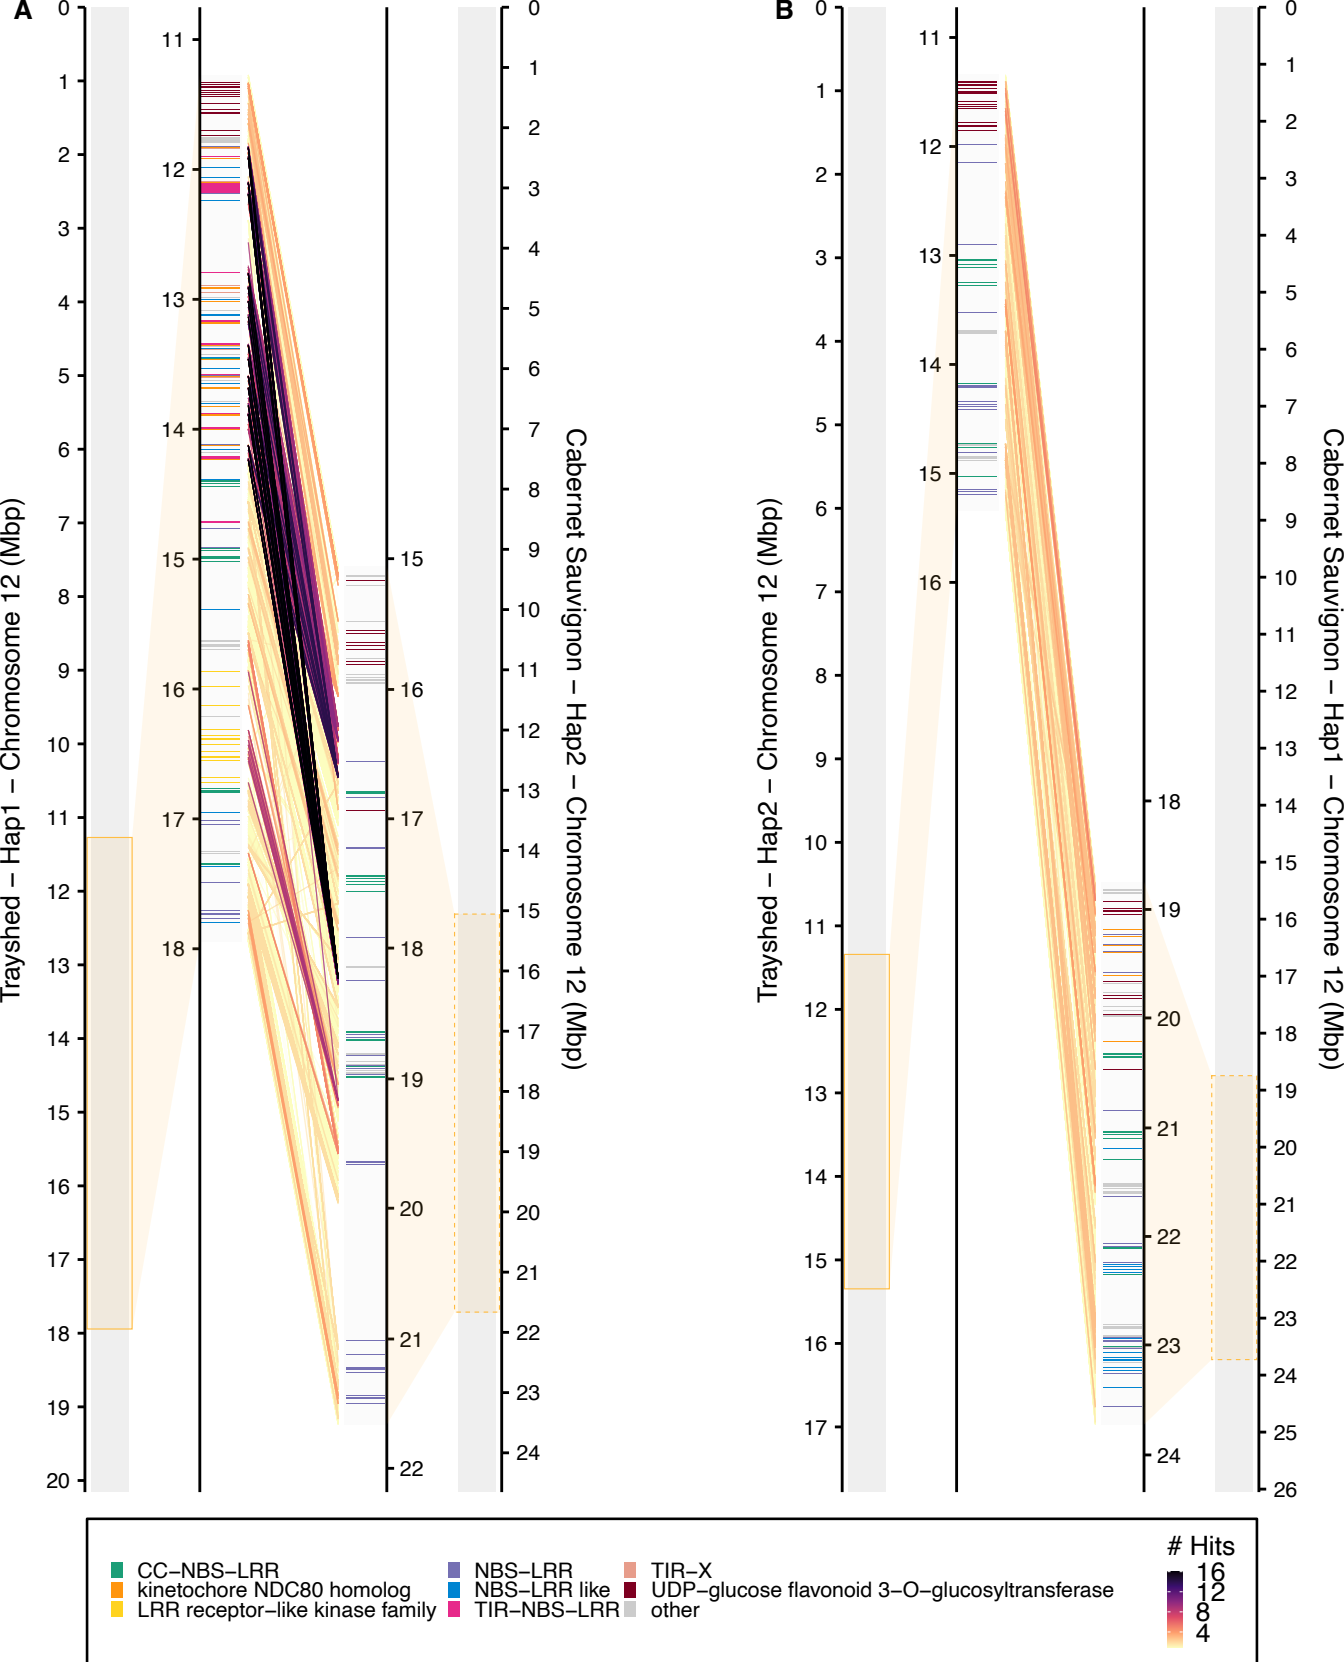

**Supplemental Figure S9:** Synteny between the *RUN1/RPV1* alleles in Trayshed and Cabernet Sauvignon. Chromosome 12 of Trayshed (left, target) and Cabernet Sauvignon (right, query) Hap2 on Hap1 (A) or Hap1 on Hap2 (B) are compared with tblastx of 50Kbp blocks. The *RUN1/RPV1* resistance locus is highlighted with an orange box. Syntenic gene content within the locus is represented as lines in the center of each panel. Duplications of Cabernet Sauvignon sequences are shown using a color gradient. Highly duplicated sequences in Trayshed are dark purple. The functional annotations depicted include categories represented by at least 5 genes. Categories represented by less than 10 genes and not related to disease resistance genes are included in the category, “other”.
