# Supplementary material
Source: publisher figshare collection journal article supplement (https://gsajournals.figshare.com/articles/dataset/_/13370819)
Supplement: Supplementary file 1 [file 1]

## Sheet: Hap1_vs_Hap1
Supplemental Table S3: Summary statistics of the nucmer alignment of Trayshed on Cabernet Sauvignon.
[REF] [QRY]
[Sequences]
TotalSeqs 19 20
AlignedSeqs 19(100.0000%) 20(100.0000%)
UnalignedSeqs 0(0.0000%) 0(0.0000%)
[Bases]
TotalBases 449786222 400450509
AlignedBases 307167640(68.2919%) 299885515(74.8870%)
UnalignedBases 142618582(31.7081%) 100564994(25.1130%)
[Alignments]
1-to-1 96552 96552
TotalLength 236936357 237751868
AvgLength 2453.9767 2462.4230
AvgIdentity 92.3872 92.3872
M-to-M 234896 234896
TotalLength 426666530 427629575
AvgLength 1816.4061 1820.5060
AvgIdentity 91.7163 91.7163
[Feature Estimates]
Breakpoints 469772 469770
Relocations 12468 12656
Translocations 29691 28468
Inversions 2278 2373
Insertions 174420 173804
InsertionSum 242349501 191094959
InsertionAvg 1389.4594 1099.4854
TandemIns 468 420
TandemInsSum 111303 101706
TandemInsAvg 237.8269 242.1571
[SNPs]
TotalSNPs 9943931 9943931
AC 436564(4.3903%) 414712(4.1705%)
AG 1570411(15.7927%) 1590257(15.9922%)
AT 685181(6.8904%) 686871(6.9074%)
CT 1587571(15.9652%) 1569222(15.7807%)
CG 273831(2.7538%) 273829(2.7537%)
CA 414712(4.1705%) 436564(4.3903%)
TG 438521(4.4099%) 416961(4.1931%)
TA 686871(6.9074%) 685181(6.8904%)
TC 1569222(15.7807%) 1587571(15.9652%)
GT 416961(4.1931%) 438521(4.4099%)
GC 273829(2.7537%) 273831(2.7538%)
GA 1590257(15.9922%) 1570411(15.7927%)
TotalGSNPs 1221741 1221741
GC 42555(3.4831%) 42540(3.4819%)
GA 190218(15.5694%) 191299(15.6579%)
GT 54387(4.4516%) 56318(4.6097%)
TA 75877(6.2106%) 75735(6.1989%)
TC 191822(15.7007%) 189755(15.5315%)
TG 56318(4.6097%) 54387(4.4516%)
AG 191299(15.6579%) 190218(15.5694%)
AT 75735(6.1989%) 75877(6.2106%)
AC 56455(4.6209%) 54780(4.4838%)
CT 189755(15.5315%) 191822(15.7007%)
CG 42540(3.4819%) 42555(3.4831%)
CA 54780(4.4838%) 56455(4.6209%)
TotalIndels 6634733 6634733
A. 1042699(15.7158%) 1308244(19.7181%)
C. 423605(6.3847%) 542475(8.1763%)
T. 1043437(15.7269%) 1311720(19.7705%)
N. 2(0.0000%) 75(0.0011%)
G. 422777(6.3722%) 539699(8.1344%)
.C 542475(8.1763%) 423605(6.3847%)
.A 1308244(19.7181%) 1042699(15.7158%)
.G 539699(8.1344%) 422777(6.3722%)
.T 1311720(19.7705%) 1043437(15.7269%)
.N 75(0.0011%) 2(0.0000%)
TotalGIndels 75392 75392
G. 4579(6.0736%) 5382(7.1387%)
T. 14119(18.7275%) 13671(18.1332%)
A. 14139(18.7540%) 13573(18.0032%)
C. 4653(6.1717%) 5276(6.9981%)
.C 5276(6.9981%) 4653(6.1717%)
.A 13573(18.0032%) 14139(18.7540%)
.T 13671(18.1332%) 14119(18.7275%)
.G 5382(7.1387%) 4579(6.0736%)

## Sheet: Hap2_vs_Hap1
[REF] [QRY]
[Sequences]
TotalSeqs 19 20
AlignedSeqs 19(100.0000%) 20(100.0000%)
UnalignedSeqs 0(0.0000%) 0(0.0000%)
[Bases]
TotalBases 449786222 369985741
AlignedBases 290764586(64.6451%) 279035760(75.4180%)
UnalignedBases 159021636(35.3549%) 90949981(24.5820%)
[Alignments]
1-to-1 91123 91123
TotalLength 221868212 222627254
AvgLength 2434.8212 2443.1511
AvgIdentity 92.3729 92.3729
M-to-M 221199 221199
TotalLength 401028836 401929256
AvgLength 1812.9776 1817.0483
AvgIdentity 91.7040 91.7040
[Feature Estimates]
Breakpoints 442377 442372
Relocations 11603 11693
Translocations 28388 27735
Inversions 2211 2234
Insertions 168915 159711
InsertionSum 256147606 173522300
InsertionAvg 1516.4290 1086.4768
TandemIns 420 385
TandemInsSum 114218 98861
TandemInsAvg 271.9476 256.7818
[SNPs]
TotalSNPs 9323495 9323495
GC 256592(2.7521%) 256488(2.7510%)
GA 1492636(16.0094%) 1472807(15.7967%)
GT 390501(4.1884%) 411695(4.4157%)
TA 642189(6.8879%) 642087(6.8868%)
TC 1473231(15.8013%) 1487645(15.9559%)
TG 411695(4.4157%) 390501(4.1884%)
AC 409436(4.3914%) 388188(4.1635%)
AT 642087(6.8868%) 642189(6.8879%)
AG 1472807(15.7967%) 1492636(16.0094%)
CT 1487645(15.9559%) 1473231(15.8013%)
CG 256488(2.7510%) 256592(2.7521%)
CA 388188(4.1635%) 409436(4.3914%)
TotalGSNPs 1138099 1138099
GC 39601(3.4796%) 39878(3.5039%)
GA 177342(15.5823%) 178397(15.6750%)
GT 50754(4.4595%) 52751(4.6350%)
TC 178332(15.6693%) 176258(15.4871%)
TA 70597(6.2031%) 70489(6.1936%)
TG 52751(4.6350%) 50754(4.4595%)
AC 52838(4.6427%) 50862(4.4690%)
AT 70489(6.1936%) 70597(6.2031%)
AG 178397(15.6750%) 177342(15.5823%)
CA 50862(4.4690%) 52838(4.6427%)
CG 39878(3.5039%) 39601(3.4796%)
CT 176258(15.4871%) 178332(15.6693%)
TotalIndels 6176089 6176089
G. 393406(6.3698%) 502948(8.1435%)
T. 971020(15.7222%) 1221285(19.7744%)
A. 971942(15.7372%) 1215804(19.6857%)
N. 2(0.0000%) 33(0.0005%)
C. 395228(6.3993%) 504421(8.1673%)
.A 1215804(19.6857%) 971942(15.7372%)
.N 33(0.0005%) 2(0.0000%)
.C 504421(8.1673%) 395228(6.3993%)
.G 502948(8.1435%) 393406(6.3698%)
.T 1221285(19.7744%) 971020(15.7222%)
TotalGIndels 71367 71367
G. 4490(6.2914%) 5027(7.0439%)
T. 13431(18.8196%) 12758(17.8766%)
A. 13568(19.0116%) 12595(17.6482%)
C. 4466(6.2578%) 5032(7.0509%)
.A 12595(17.6482%) 13568(19.0116%)
.C 5032(7.0509%) 4466(6.2578%)
.G 5027(7.0439%) 4490(6.2914%)
.T 12758(17.8766%) 13431(18.8196%)

## Sheet: Hap1_vs_Hap2
[REF] [QRY]
[Sequences]
TotalSeqs 19 20
AlignedSeqs 19(100.0000%) 20(100.0000%)
UnalignedSeqs 0(0.0000%) 0(0.0000%)
[Bases]
TotalBases 444206034 400450509
AlignedBases 297336887(66.9367%) 289048239(72.1808%)
UnalignedBases 146869147(33.0633%) 111402270(27.8192%)
[Alignments]
1-to-1 93661 93661
TotalLength 226957490 227743349
AvgLength 2423.1803 2431.5708
AvgIdentity 92.3706 92.3706
M-to-M 230776 230776
TotalLength 414781042 415732262
AvgLength 1797.3318 1801.4536
AvgIdentity 91.6725 91.6725
[Feature Estimates]
Breakpoints 461539 461531
Relocations 11904 11988
Translocations 29646 28411
Inversions 2294 2588
Insertions 171728 170673
InsertionSum 246314716 200218235
InsertionAvg 1434.3305 1173.1102
TandemIns 436 398
TandemInsSum 104369 91390
TandemInsAvg 239.3784 229.6231
[SNPs]
TotalSNPs 9565900 9565900
CG 261610(2.7348%) 262481(2.7439%)
CT 1528978(15.9836%) 1512677(15.8132%)
CA 398667(4.1676%) 420872(4.3997%)
GT 400252(4.1842%) 420434(4.3951%)
GA 1531203(16.0069%) 1515544(15.8432%)
GC 262481(2.7439%) 261610(2.7348%)
TA 657130(6.8695%) 656052(6.8582%)
TG 420434(4.3951%) 400252(4.1842%)
TC 1512677(15.8132%) 1528978(15.9836%)
AC 420872(4.3997%) 398667(4.1676%)
AG 1515544(15.8432%) 1531203(16.0069%)
AT 656052(6.8582%) 657130(6.8695%)
TotalGSNPs 1165073 1165073
GA 181268(15.5585%) 182611(15.6738%)
GT 51820(4.4478%) 53635(4.6036%)
GC 40361(3.4642%) 40350(3.4633%)
AC 53786(4.6165%) 52393(4.4970%)
AT 72249(6.2012%) 72342(6.2092%)
AG 182611(15.6738%) 181268(15.5585%)
TC 182890(15.6977%) 181368(15.5671%)
TA 72342(6.2092%) 72249(6.2012%)
TG 53635(4.6036%) 51820(4.4478%)
CG 40350(3.4633%) 40361(3.4642%)
CA 52393(4.4970%) 53786(4.6165%)
CT 181368(15.5671%) 182890(15.6977%)
TotalIndels 6316721 6316721
C. 402753(6.3760%) 517380(8.1906%)
G. 400584(6.3416%) 515049(8.1537%)
N. 1(0.0000%) 94(0.0015%)
T. 989881(15.6708%) 1249833(19.7861%)
A. 990937(15.6875%) 1250209(19.7921%)
.N 94(0.0015%) 1(0.0000%)
.A 1250209(19.7921%) 990937(15.6875%)
.T 1249833(19.7861%) 989881(15.6708%)
.G 515049(8.1537%) 400584(6.3416%)
.C 517380(8.1906%) 402753(6.3760%)
TotalGIndels 73257 73257
G. 4477(6.1114%) 5266(7.1884%)
A. 13538(18.4801%) 13388(18.2754%)
T. 13380(18.2645%) 13373(18.2549%)
C. 4465(6.0950%) 5370(7.3304%)
.C 5370(7.3304%) 4465(6.0950%)
.G 5266(7.1884%) 4477(6.1114%)
.T 13373(18.2549%) 13380(18.2645%)
.A 13388(18.2754%) 13538(18.4801%)

## Sheet: Hap2_vs_Hap2
[REF] [QRY]
[Sequences]
TotalSeqs 19 20
AlignedSeqs 19(100.0000%) 20(100.0000%)
UnalignedSeqs 0(0.0000%) 0(0.0000%)
[Bases]
TotalBases 444206034 369985741
AlignedBases 278761958(62.7551%) 265415586(71.7367%)
UnalignedBases 165444076(37.2449%) 104570155(28.2633%)
[Alignments]
1-to-1 87568 87568
TotalLength 209010191 209719162
AvgLength 2386.8330 2394.9292
AvgIdentity 92.3314 92.3314
M-to-M 216712 216712
TotalLength 388005168 388869081
AvgLength 1790.4185 1794.4049
AvgIdentity 91.6327 91.6327
[Feature Estimates]
Breakpoints 433405 433403
Relocations 11059 11181
Translocations 28602 27660
Inversions 2163 2454
Insertions 166428 155896
InsertionSum 263518602 185954412
InsertionAvg 1583.3790 1192.8107
TandemIns 399 368
TandemInsSum 99153 97147
TandemInsAvg 248.5038 263.9864
[SNPs]
TotalSNPs 8867942 8867942
GT 369796(4.1700%) 390373(4.4021%)
GC 241804(2.7267%) 241288(2.7209%)
GA 1422359(16.0393%) 1407400(15.8706%)
TC 1406161(15.8567%) 1419126(16.0029%)
TA 606791(6.8425%) 606307(6.8371%)
TG 390373(4.4021%) 369796(4.1700%)
CA 367914(4.1488%) 388623(4.3823%)
CT 1419126(16.0029%) 1406161(15.8567%)
CG 241288(2.7209%) 241804(2.7267%)
AC 388623(4.3823%) 367914(4.1488%)
AT 606307(6.8371%) 606791(6.8425%)
AG 1407400(15.8706%) 1422359(16.0393%)
TotalGSNPs 1062223 1062223
AT 65873(6.2014%) 66023(6.2155%)
AC 49251(4.6366%) 47353(4.4579%)
AG 166471(15.6719%) 165447(15.5755%)
CA 47353(4.4579%) 49251(4.6366%)
CT 164871(15.5213%) 166704(15.6939%)
CG 36971(3.4805%) 36708(3.4558%)
TA 66023(6.2155%) 65873(6.2014%)
TC 166704(15.6939%) 164871(15.5213%)
TG 49146(4.6267%) 47405(4.4628%)
GT 47405(4.4628%) 49146(4.6267%)
GA 165447(15.5755%) 166471(15.6719%)
GC 36708(3.4558%) 36971(3.4805%)
TotalIndels 5787009 5787009
G. 368253(6.3634%) 470450(8.1294%)
T. 909321(15.7131%) 1144324(19.7740%)
C. 368634(6.3700%) 473306(8.1788%)
A. 910213(15.7286%) 1142474(19.7420%)
N. 1(0.0000%) 33(0.0006%)
.G 470450(8.1294%) 368253(6.3634%)
.T 1144324(19.7740%) 909321(15.7131%)
.N 33(0.0006%) 1(0.0000%)
.A 1142474(19.7420%) 910213(15.7286%)
.C 473306(8.1788%) 368634(6.3700%)
TotalGIndels 67918 67918
A. 12634(18.6018%) 12226(18.0011%)
C. 4218(6.2104%) 4994(7.3530%)
T. 12505(18.4119%) 12235(18.0144%)
G. 4213(6.2031%) 4893(7.2043%)
.G 4893(7.2043%) 4213(6.2031%)
.A 12226(18.0011%) 12634(18.6018%)
.C 4994(7.3530%) 4218(6.2104%)
.T 12235(18.0144%) 12505(18.4119%)
