# Supplementary material
Source: publisher figshare collection journal article supplement (https://gsajournals.figshare.com/articles/dataset/_/13370819)
Supplement: Supplementary file 3 [file 1]

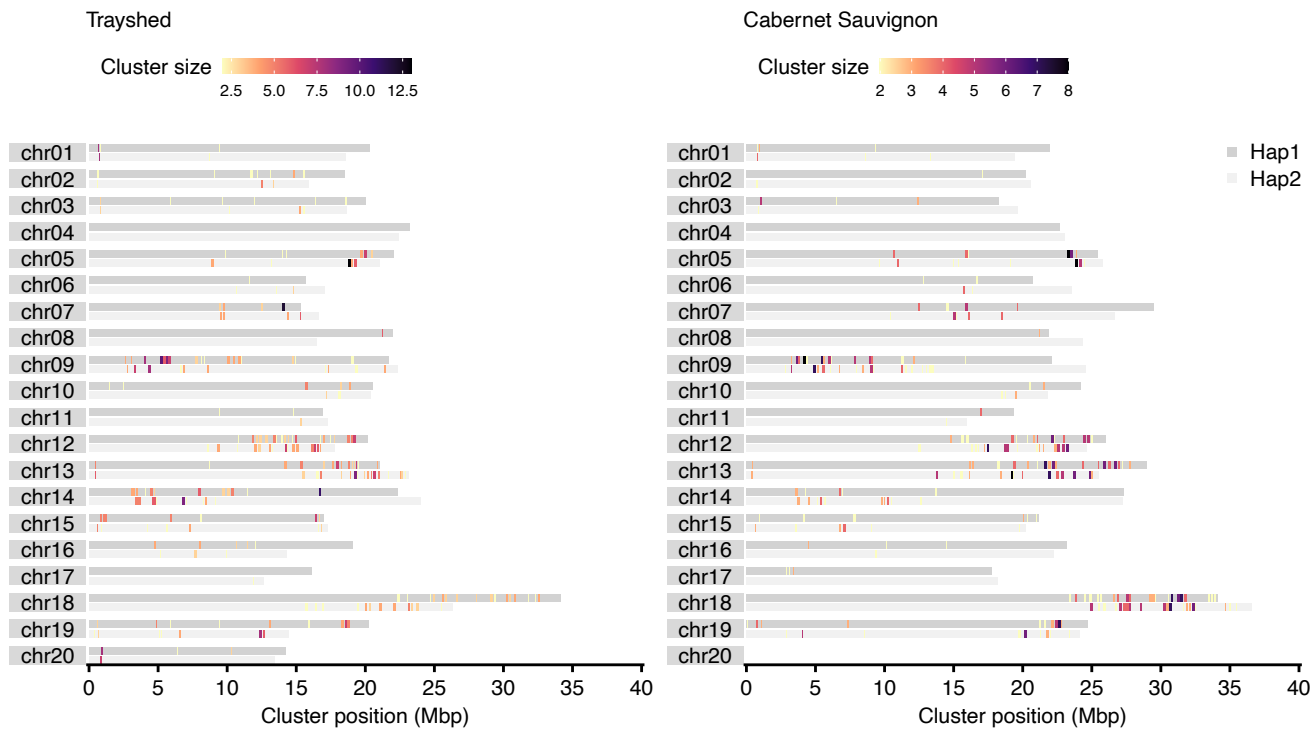

**Supplemental Figure S7: NBS-LRR gene clusters distribution.**

Clusters of NBS-LRR consisting of at least two NBS-LRR genes separated by a maximum of eight non NBS-LRR genes in windows of a maximum of 200 kbp long are represented for both Trayshed and Cabernet Sauvignon haplotypes.
