# Supplementary material
Source: publisher figshare collection journal article supplement (https://gsajournals.figshare.com/articles/dataset/_/13370819)
Supplement: Supplementary file 4 [file 1]

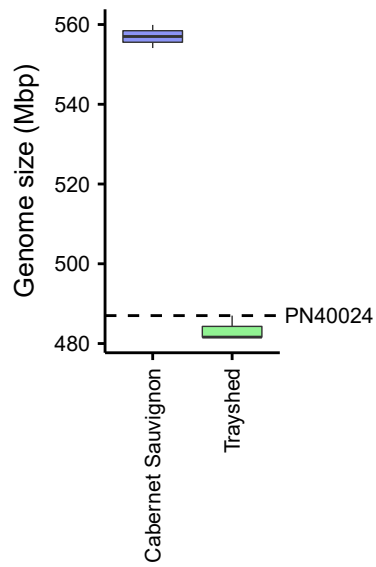

**Supplemental Figure S1:** Genome size estimated by flow cytometry.

For each cultivar, genome size of three individual leaves was estimated by flow cytometry. The genome assembly size of PN40024 is represented as a dashed line.
