# Supplementary material
Source: publisher figshare collection journal article supplement (https://gsajournals.figshare.com/articles/dataset/_/13370819)
Supplement: Supplementary file 6 [file 1]

**A**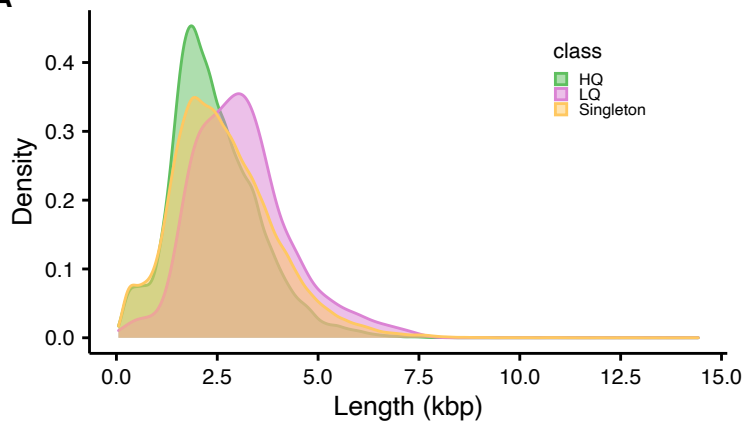**B**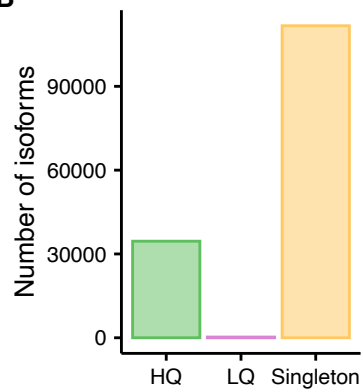**C**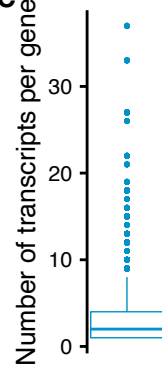

**Supplemental Figure S6:** Summary statistics on the full-length cDNA sequences.

Full-length cDNA were sequenced to improve the accuracy of the gene annotation and identify spliced variants. The distribution of the isoform length (**A**) and the total number of isoforms (**B**) are represented by class. **C.** Summary of the number of transcripts per gene after isoform prediction.
