# Supplementary material
Source: publisher figshare collection journal article supplement (https://gsajournals.figshare.com/articles/dataset/_/13370819)
Supplement: Supplementary file 7 [file 1]

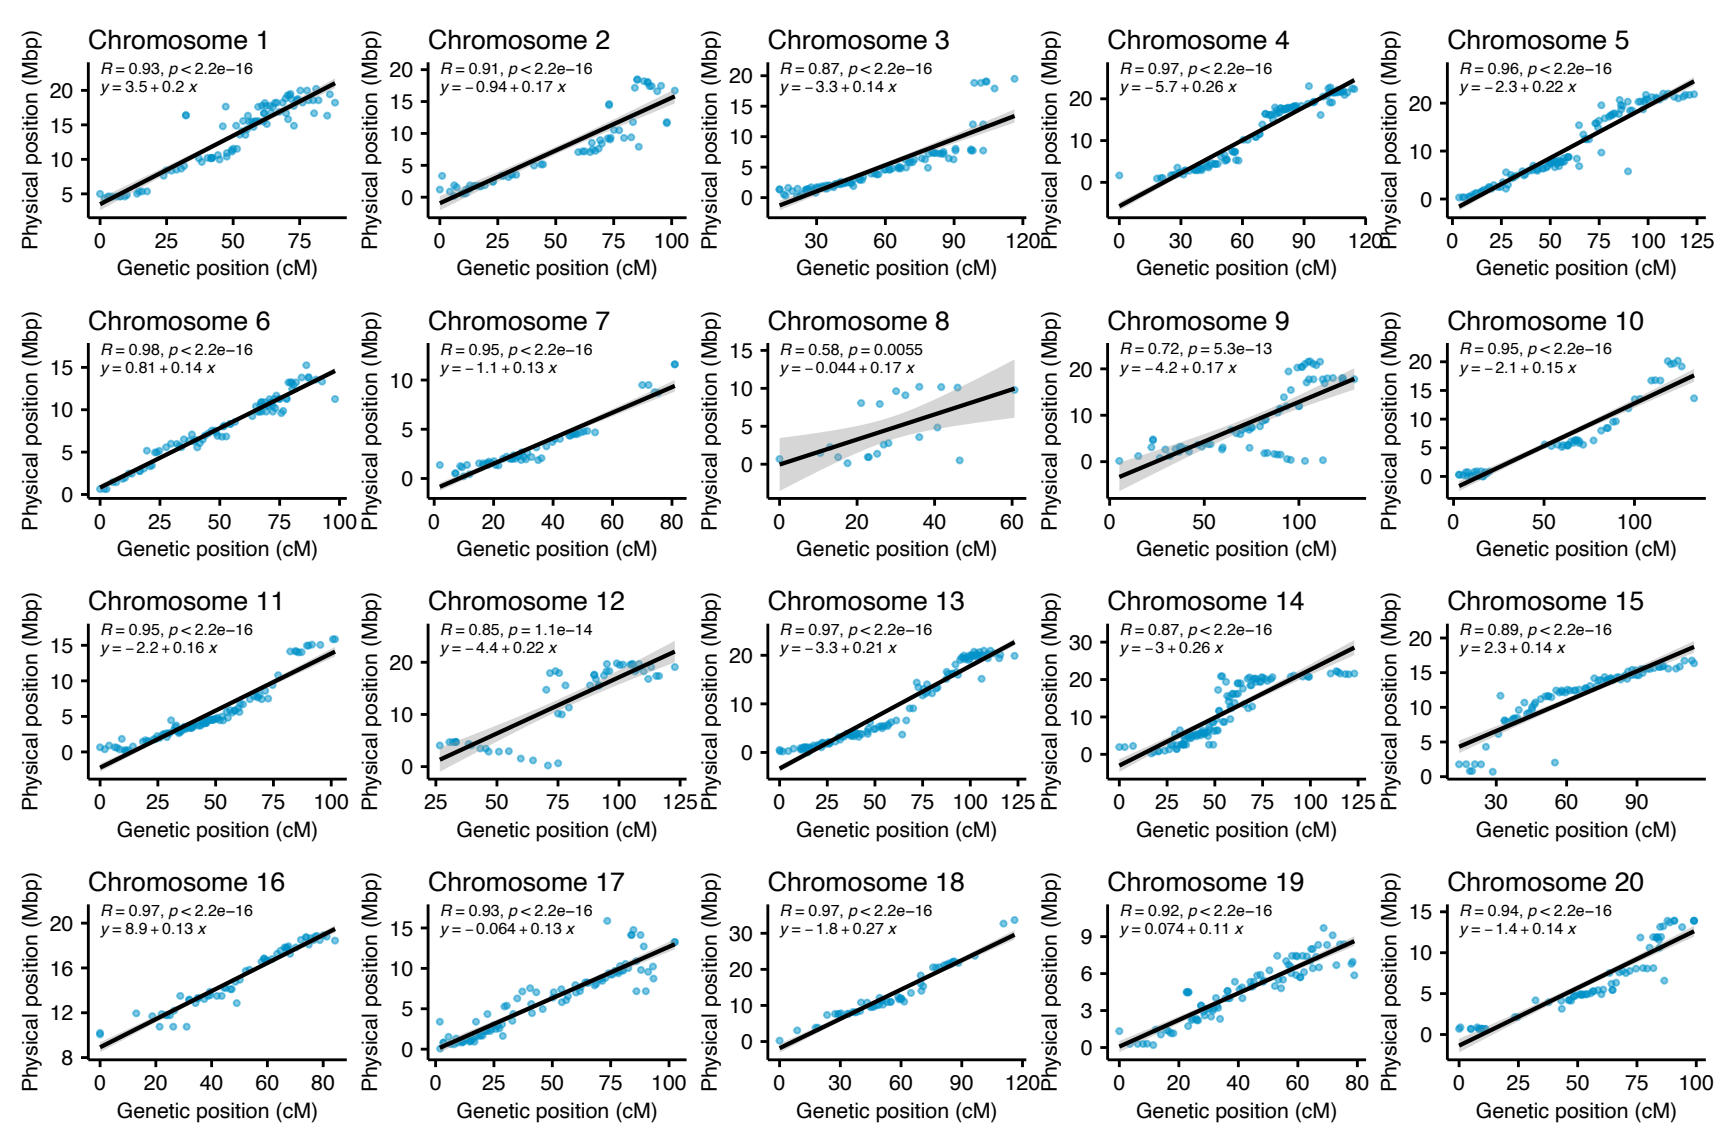

**Supplemental Figure S2:** Comparison of SNP markers positions from a high-density linkage map (Lewter *et al.*, 2019) and their mapped locations on the reconstructed chromosomes of Trayshed Hap1.

Flanking sequences of 500 bp of each side of the SNPs were extracted from the PN40024 V0 genome and mapped on the reconstructed chromosomes of Trayshed using BLAT.
