# Supplementary material
Source: publisher figshare collection journal article supplement (https://gsajournals.figshare.com/articles/dataset/_/13370819)
Supplement: Supplementary file 8 [file 1]

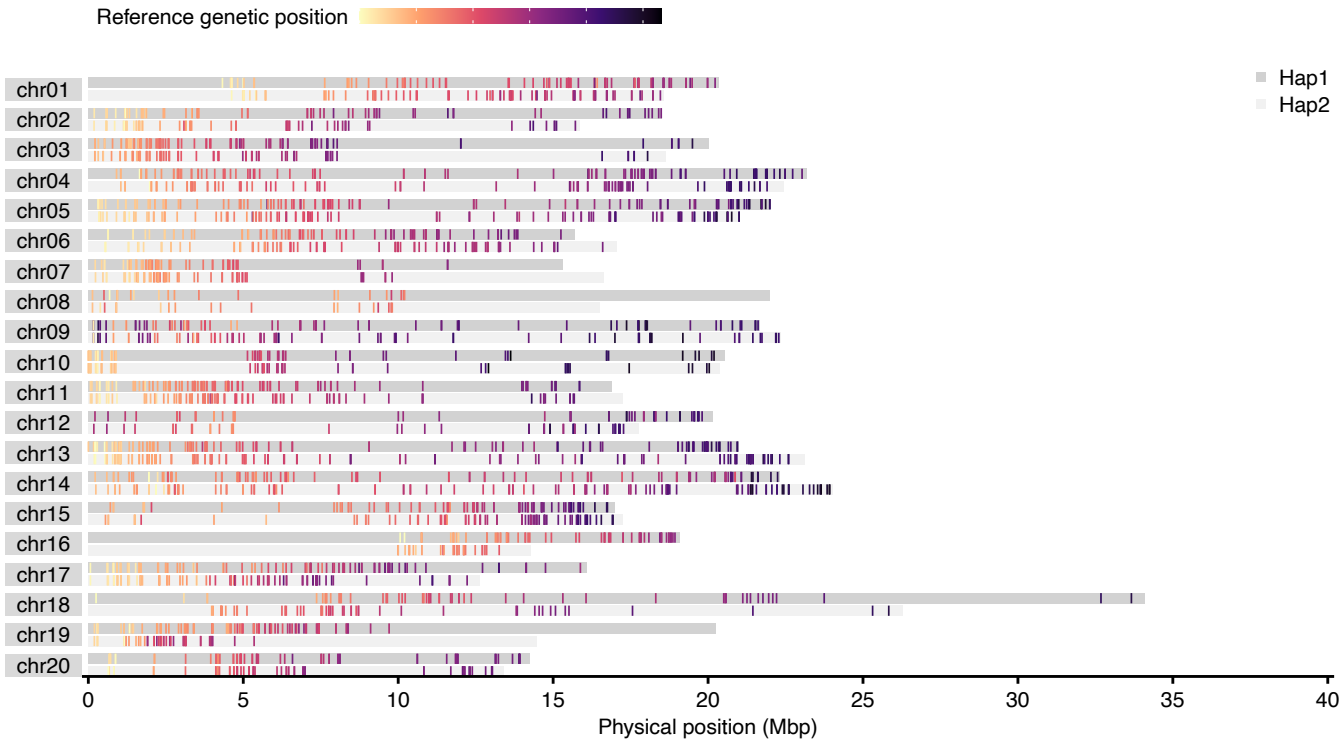

**Supplemental Figure S4:** SNP markers localization on Trayshed chromosomes.

The mapping is the same as in Figure S2 and S3. Reference mapping on the high-density linkage group map (Lewter *et al.*, 2019) follows a continuous color gradient.
