# Supplementary material
Source: publisher figshare collection journal article supplement (https://gsajournals.figshare.com/articles/dataset/_/13370819)

**Supplemental Figure S5:** Whole-genome alignment of Trayshed (Query, y-axis) on Cabernet Sauvignon (Reference, x-axis); **A)** Hap2 vs Hap1, **B)** Hap1 vs Hap2, and **C)** Hap2 vs Hap2. The percent identity (%id) between the alignments is displayed as a color gradient.

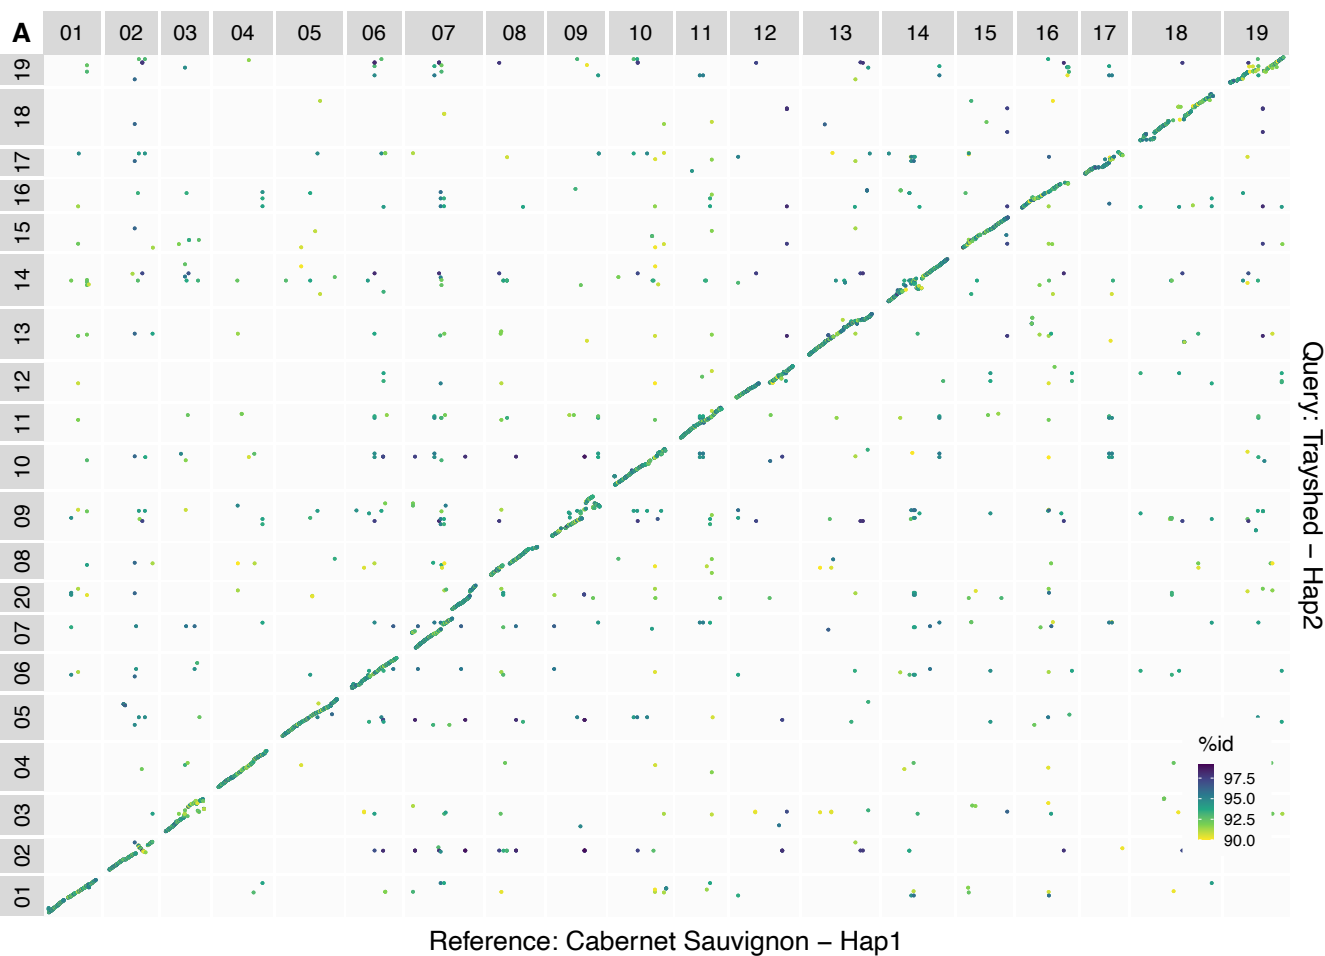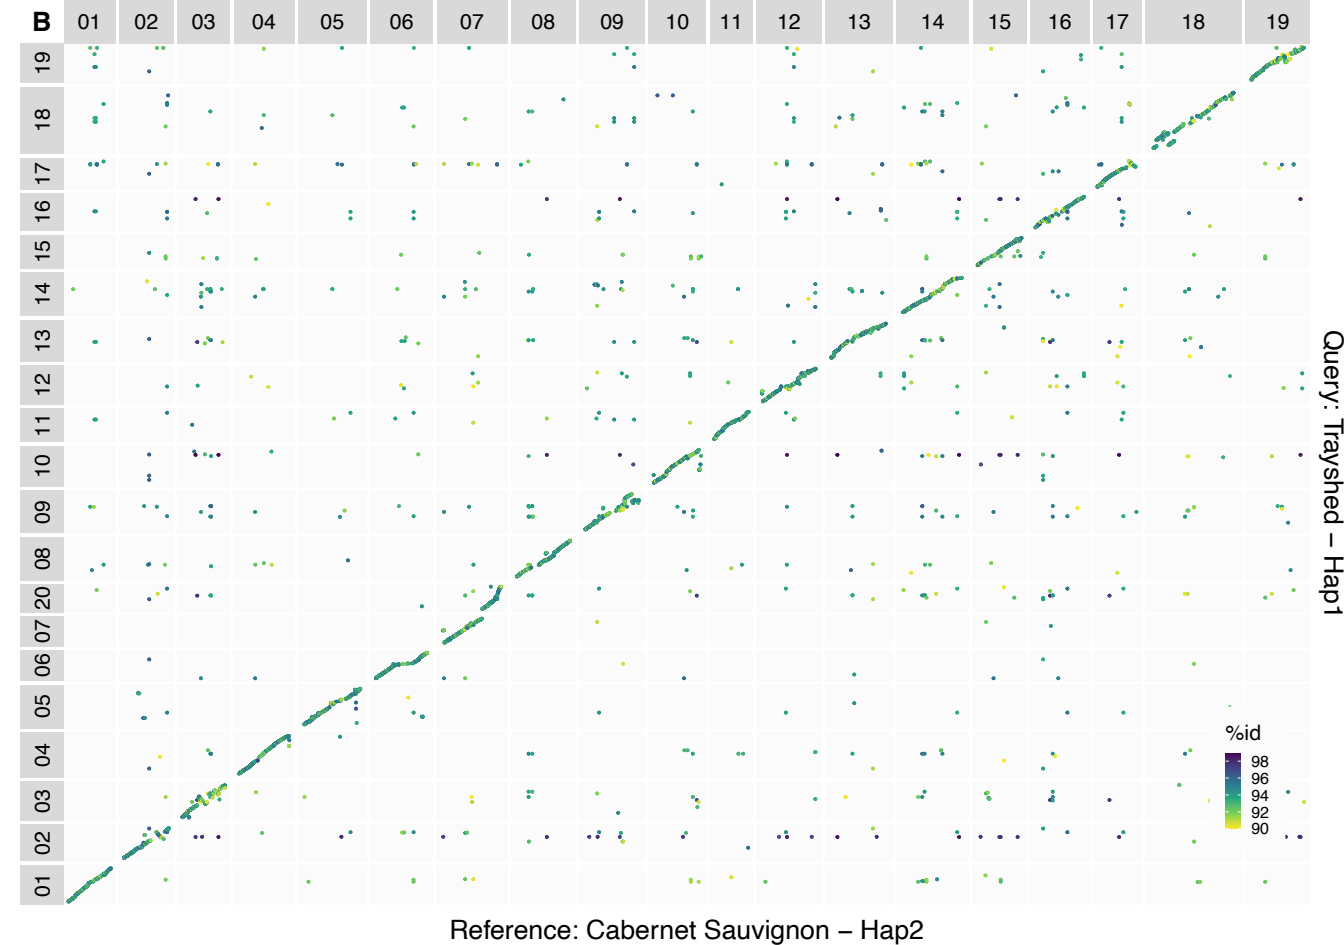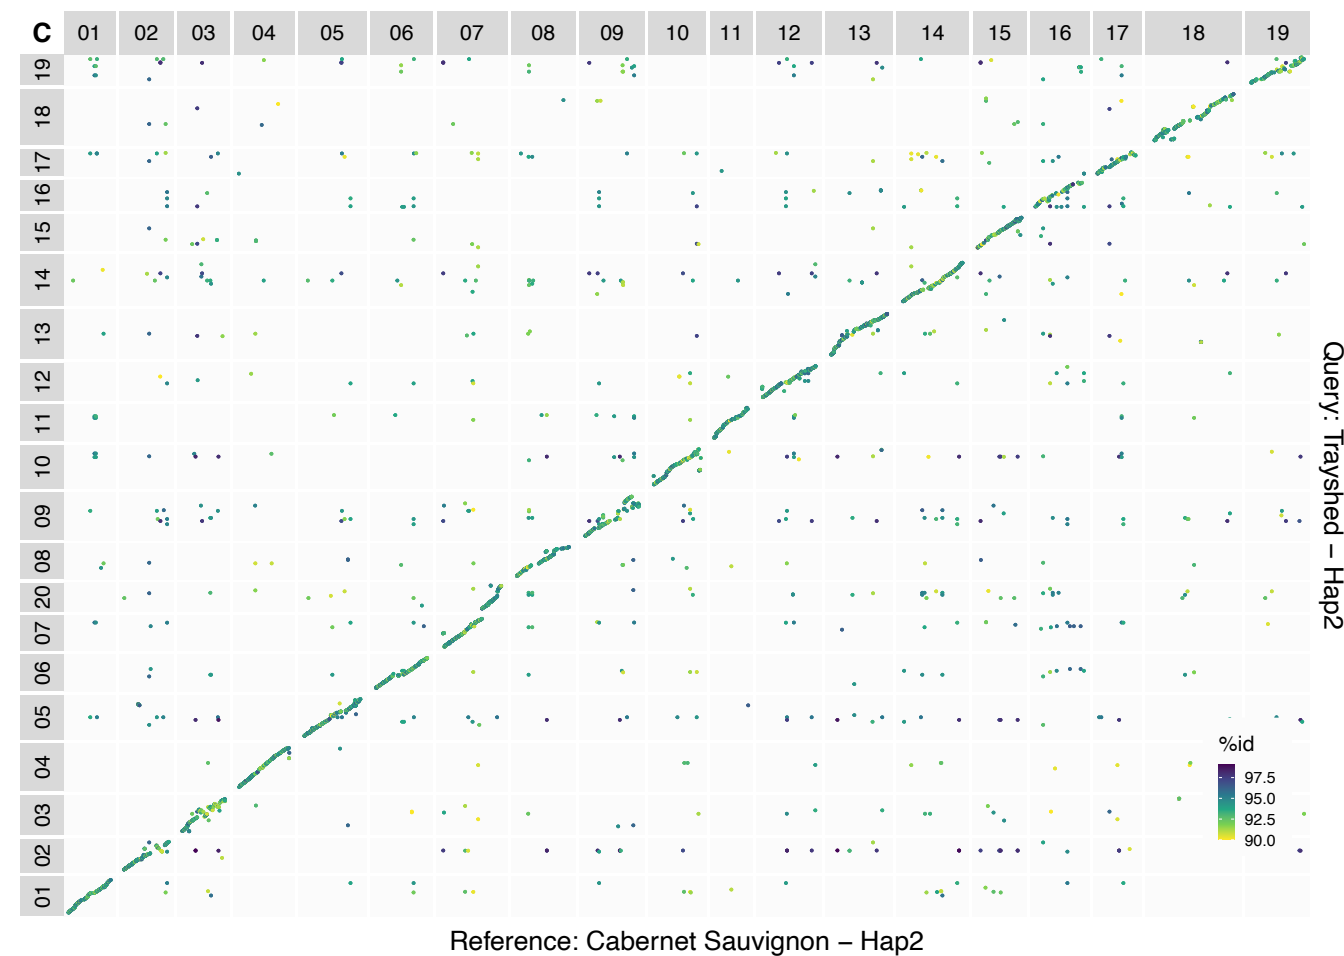

Supplement: Supplementary file 9 [file 1]
